# Supplementary material
Source: PubMed Central journal article supplement (PMC6151288)
Supplement: NIHMS962643-supplement-supplement_1.pdf [file NIHMS962643-supplement-supplement_1.pdf]

**Table S1. Sensitivity analysis of the empirical dietary inflammatory pattern scores and risk of colorectal cancer according to tumor *F nucleatum* status in the pooled cohorts of the Nurses' Health Study (women, 1984-2012) and the Health Professionals Follow-up Study (men, 1986-2012) by using inverse probability weighting**

|                       | Tumor<br><i>F nucleatum</i><br>status |                            | Tertiles of the empirical dietary inflammatory pattern (EDIP) scores |                  |                  | $P_{\text{trend}}^*$ | $P_{\text{heterogeneity}}^\dagger$ |
|-----------------------|---------------------------------------|----------------------------|----------------------------------------------------------------------|------------------|------------------|----------------------|------------------------------------|
|                       |                                       |                            | T1 (lowest)                                                          | T2               | T3 (highest)     |                      |                                    |
| Colorectal cancer     |                                       |                            |                                                                      |                  |                  |                      |                                    |
|                       | Negative                              | Age-adjusted HR (95% CI)   | 1 (reference)                                                        | 0.94 (0.79–1.12) | 0.93 (0.78–1.11) | 0.41                 | 0.05                               |
|                       |                                       | Multivariable HR (95% CI)‡ | 1 (reference)                                                        | 0.97 (0.81–1.16) | 0.95 (0.79–1.14) | 0.57                 |                                    |
|                       | Positive                              | Age-adjusted HR (95% CI)   | 1 (reference)                                                        | 1.08 (0.65–1.77) | 1.52 (0.94–2.45) | 0.07                 | 0.06                               |
|                       |                                       | Multivariable HR (95% CI)‡ | 1 (reference)                                                        | 1.10 (0.67–1.81) | 1.55 (0.96–2.49) | 0.06                 |                                    |
| Proximal colon cancer |                                       |                            |                                                                      |                  |                  |                      |                                    |
|                       | Negative                              | Age-adjusted HR (95% CI)   | 1 (reference)                                                        | 0.93 (0.72–1.20) | 0.90 (0.70–1.16) | 0.49                 | 0.002                              |
|                       |                                       | Multivariable HR (95% CI)‡ | 1 (reference)                                                        | 0.93 (0.72–1.20) | 0.89 (0.68–1.17) | 0.49                 |                                    |
|                       | Positive                              | Age-adjusted HR (95% CI)   | 1 (reference)                                                        | 1.85 (0.92–3.71) | 2.58 (1.33–5.02) | 0.002                | 0.003                              |
|                       |                                       | Multivariable HR (95% CI)‡ | 1 (reference)                                                        | 1.84 (0.92–3.68) | 2.55 (1.31–4.98) | 0.003                |                                    |

CI, confidence interval; *F nucleatum*, *Fusobacterium nucleatum*; HR, hazard ratio; T1, tertile 1; T2, tertile 2; T3, tertile 3.

Cox proportional cause-specific hazards regression weighted by the inverse probability of availability of tumor *F nucleatum* status for competing risks data was used to compute HRs and 95% CIs.

All analyses were stratified by age (in month), year of questionnaire return and sex.

\* Linear trend test using the median value of each category.

† The Wald test was used for the heterogeneity of the association between the empirical dietary inflammatory pattern scores and colorectal cancer risk according to tumor *F nucleatum* status (negative vs positive).

‡ Multivariable HR was adjusted for pack-years smoked (0 vs 1-19 vs 20-39 vs  $\geq 40$  pack-years), family history of colorectal cancer (yes vs no), endoscopy status (yes vs no), physical activity level [quintiles of mean metabolic equivalent task score (METs) - hours per week], total calorie intake (quintiles of kcal/day), total alcohol intake (0 vs 1-5 vs 6-15 vs  $> 15$  g/day), current multivitamin use (yes vs no), and regular aspirin use (yes vs no).

**Table S2. The empirical dietary inflammatory pattern scores and risk of colorectal cancer according to tumor *F nucleatum* status in the Nurses' Health Study (women, 1984-2012) and the Health Professionals Follow-up Study (men, 1986-2012) separately**

|                   | Tumor<br><i>F nucleatum</i><br>status | Tertiles of the empirical dietary inflammatory pattern (EDIP) scores |               |                            | $P_{\text{trend}}^*$ | $P_{\text{heterogeneity}}^\dagger$ |                  |      |
|-------------------|---------------------------------------|----------------------------------------------------------------------|---------------|----------------------------|----------------------|------------------------------------|------------------|------|
|                   |                                       | T1 (lowest)                                                          | T2            | T3 (highest)               |                      |                                    |                  |      |
| Women (NHS)       |                                       | Person-years                                                         | 677,257       | 645,317                    | 637,874              |                                    |                  |      |
| Colorectal cancer | Negative                              | N of cases (n=508)                                                   | 177           | 187                        | 144                  |                                    |                  |      |
|                   |                                       | Age-adjusted HR (95% CI)                                             | 1 (reference) | 1.08 (0.88–1.32)           | 0.89 (0.72–1.11)     | 0.36                               |                  |      |
|                   |                                       | Multivariable HR (95% CI)‡                                           | 1 (reference) | 1.08 (0.87–1.33)           | 0.87 (0.70–1.10)     | 0.29                               |                  |      |
|                   |                                       | N of cases (n=442)                                                   | 161           | 162                        | 119                  |                                    |                  |      |
|                   |                                       | Age-adjusted HR (95% CI)                                             | 1 (reference) | 1.03 (0.83–1.28)           | 0.81 (0.64–1.03)     | 0.10                               |                  |      |
|                   |                                       | Multivariable HR (95% CI)‡                                           | 1 (reference) | 1.03 (0.82–1.29)           | 0.79 (0.62–1.02)     | 0.08                               |                  |      |
|                   | Positive                              | N of cases (n=66)                                                    | 16            | 25                         | 25                   |                                    |                  |      |
|                   |                                       | Age-adjusted HR (95% CI)                                             | 1 (reference) | 1.55 (0.83–2.91)           | 1.72 (0.92–3.23)     | 0.09                               |                  |      |
|                   |                                       | Multivariable HR (95% CI)‡                                           | 1 (reference) | 1.55 (0.83–2.92)           | 1.69 (0.89–3.18)     | 0.10                               |                  |      |
|                   |                                       | Proximal colon cancer                                                | Negative      | N of cases (n=222)         | 89                   | 78                                 | 55               |      |
|                   |                                       |                                                                      |               | Age-adjusted HR (95% CI)   | 1 (reference)        | 0.90 (0.66–1.22)                   | 0.69 (0.49–0.97) | 0.04 |
|                   |                                       |                                                                      |               | Multivariable HR (95% CI)‡ | 1 (reference)        | 0.89 (0.65–1.21)                   | 0.68 (0.48–0.97) | 0.04 |
| Positive          | N of cases (n=46)                     |                                                                      | 8             | 18                         | 20                   |                                    |                  |      |
|                   | Age-adjusted HR (95% CI)              |                                                                      | 1 (reference) | 2.26 (0.98–5.21)           | 2.68 (1.18–6.10)     | 0.02                               |                  |      |
|                   | Multivariable HR (95% CI)‡            |                                                                      | 1 (reference) | 2.20 (0.95–5.10)           | 2.65 (1.16–6.07)     | 0.02                               |                  |      |
| Men (HPFS)        |                                       | Person-years                                                         | 362,752       | 345,852                    | 329,534              |                                    |                  |      |
| Colorectal cancer | Negative                              | N of cases (n=443)                                                   | 132           | 142                        | 169                  |                                    |                  |      |
|                   |                                       | Age-adjusted HR (95% CI)                                             | 1 (reference) | 1.05 (0.82–1.33)           | 1.33 (1.05–1.67)     | 0.02                               |                  |      |
|                   |                                       | Multivariable HR (95% CI)‡                                           | 1 (reference) | 1.15 (0.90–1.47)           | 1.48 (1.16–1.90)     | 0.003                              |                  |      |
|                   |                                       | N of cases (n=394)                                                   | 116           | 129                        | 149                  |                                    |                  |      |
|                   |                                       | Age-adjusted HR (95% CI)                                             | 1 (reference) | 1.08 (0.84–1.39)           | 1.32 (1.03–1.68)     | 0.04                               |                  |      |
|                   |                                       | Multivariable HR (95% CI)‡                                           | 1 (reference) | 1.18 (0.91–1.53)           | 1.47 (1.13–1.91)     | 0.01                               |                  |      |
|                   | Positive                              | N of cases (n=49)                                                    | 16            | 13                         | 20                   |                                    |                  |      |
|                   |                                       | Age-adjusted HR (95% CI)                                             | 1 (reference) | 0.81 (0.39–1.70)           | 1.41 (0.73–2.74)     | 0.27                               |                  |      |
|                   |                                       | Multivariable HR (95% CI)‡                                           | 1 (reference) | 0.90 (0.43–1.90)           | 1.58 (0.81–3.08)     | 0.16                               |                  |      |
|                   |                                       | Proximal colon cancer                                                | Negative      | N of cases (n=174)         | 47                   | 60                                 | 67               |      |
|                   |                                       |                                                                      |               | Age-adjusted HR (95% CI)   | 1 (reference)        | 1.19 (0.81–1.76)                   | 1.40 (0.96–2.04) | 0.10 |
|                   |                                       |                                                                      |               | Multivariable HR (95% CI)‡ | 1 (reference)        | 1.28 (0.86–1.91)                   | 1.50 (1.00–2.25) | 0.06 |
| Positive          | N of cases (n=21)                     |                                                                      | 5             | 6                          | 10                   |                                    |                  |      |
|                   | Age-adjusted HR (95% CI)              |                                                                      | 1 (reference) | 1.33 (0.40–4.44)           | 2.47 (0.84–7.29)     | 0.08                               |                  |      |
|                   | Multivariable HR (95% CI)‡            |                                                                      | 1 (reference) | 1.48 (0.44–4.94)           | 2.67 (0.90–7.95)     | 0.06                               |                  |      |

---

CI, confidence interval; *F nucleatum*, *Fusobacterium nucleatum*; HPFS, Health Professionals Follow-up Study; HR, hazard ratio; NHS, Nurses' Health Study; T1, tertile 1; T2, tertile 2; T3, tertile 3.

Cox proportional cause-specific hazards regression for competing risks data was used to compute HRs and 95% CIs.

All analyses were stratified by age (in month) and year of questionnaire return.

\* Linear trend test using the median value of each category.

† The likelihood ratio test was used for the heterogeneity of the association between the empirical dietary inflammatory pattern scores and colorectal cancer risk according to tumor *F nucleatum* status (negative vs positive).

‡ Multivariable HR was adjusted for pack-years smoked (0 vs 1-19 vs 20-39 vs  $\geq 40$  pack-years), family history of colorectal cancer (yes vs no), endoscopy status (yes vs no), physical activity level [quintiles of mean metabolic equivalent task score (METS) - hours per week], total calorie intake (quintiles of kcal/day), total alcohol intake (0 vs 1-5 vs 6-15 vs  $> 15$  g/day), current multivitamin use (yes vs no), and regular aspirin use (yes vs no).

**Table S3. The empirical dietary inflammatory pattern scores and risk of colorectal cancer according to tumor *F nucleatum* status in different prudent dietary pattern groups in the pooled cohorts of the Nurses' Health Study (women, 1984-2012) and the Health Professionals Follow-up Study (men, 1986-2012)**

| Tumor <i>F nucleatum</i> status     | Prudent dietary pattern scores                                       |                  |                  |                             |                                                                      |                  |                  |                             |
|-------------------------------------|----------------------------------------------------------------------|------------------|------------------|-----------------------------|----------------------------------------------------------------------|------------------|------------------|-----------------------------|
|                                     | Low                                                                  |                  |                  |                             | High                                                                 |                  |                  |                             |
|                                     | Tertiles of the empirical dietary inflammatory pattern (EDIP) scores |                  |                  |                             | Tertiles of the empirical dietary inflammatory pattern (EDIP) scores |                  |                  |                             |
|                                     | T1 (lowest)                                                          | T2               | T3 (highest)     | <i>P</i> <sub>trend</sub> * | T1 (lowest)                                                          | T2               | T3 (highest)     | <i>P</i> <sub>trend</sub> * |
| Negative                            |                                                                      |                  |                  |                             |                                                                      |                  |                  |                             |
| N of cases                          | 144                                                                  | 146              | 140              |                             | 133                                                                  | 145              | 128              |                             |
| Age-adjusted HR (95% CI)            | 1 (reference)                                                        | 0.91 (0.72–1.15) | 0.94 (0.75–1.20) | 0.56                        | 1 (reference)                                                        | 1.16 (0.91–1.47) | 1.10 (0.86–1.41) | 0.33                        |
| Multivariable HR (95% CI) †         | 1 (reference)                                                        | 0.93 (0.73–1.18) | 0.96 (0.75–1.24) | 0.69                        | 1 (reference)                                                        | 1.24 (0.97–1.58) | 1.18 (0.90–1.53) | 0.15                        |
| Positive                            |                                                                      |                  |                  |                             |                                                                      |                  |                  |                             |
| N of cases                          | 15                                                                   | 21               | 30               |                             | 17                                                                   | 17               | 15               |                             |
| Age-adjusted HR (95% CI)            | 1 (reference)                                                        | 1.30 (0.67–2.55) | 2.02 (1.09–3.78) | 0.02                        | 1 (reference)                                                        | 1.03 (0.52–2.04) | 0.96 (0.47–1.93) | 0.88                        |
| Multivariable HR (95% CI) †         | 1 (reference)                                                        | 1.34 (0.68–2.62) | 2.01 (1.07–3.79) | 0.02                        | 1 (reference)                                                        | 1.10 (0.56–2.18) | 1.02 (0.50–2.07) | 0.96                        |
| <i>P</i> <sub>heterogeneity</sub> ‡ |                                                                      | 0.02             |                  |                             |                                                                      | 0.66             |                  |                             |

CI, confidence interval; *F nucleatum*, *Fusobacterium nucleatum*; HR, hazard ratio; T1, tertile 1; T2, tertile 2; T3, tertile 3.

Cox proportional cause-specific hazards regression for competing risks data was used to compute HRs and 95% CIs.

All analyses were stratified by age (in month), year of questionnaire return and sex.

\* Linear trend test using the median value of each category.

† Multivariable HR was adjusted for pack-years smoked (0 vs 1-19 vs 20-39 vs ≥ 40 pack-years), family history of colorectal cancer (yes vs no), endoscopy status (yes vs no), physical activity level [quintiles of mean metabolic equivalent task score (METs) - hours per week], total calorie intake (quintiles of kcal/day), total alcohol intake (0 vs 1-5 vs 6-15 vs > 15 g/day), current multivitamin use (yes vs no) and regular aspirin use (yes vs no).

‡ The likelihood ratio test was used for the heterogeneity of the association between the empirical dietary inflammatory pattern scores and colorectal cancer risk according to tumor *F nucleatum* status (negative vs positive).
